# Supplementary material
Source: PubMed Central journal article supplement (PMC3304103)

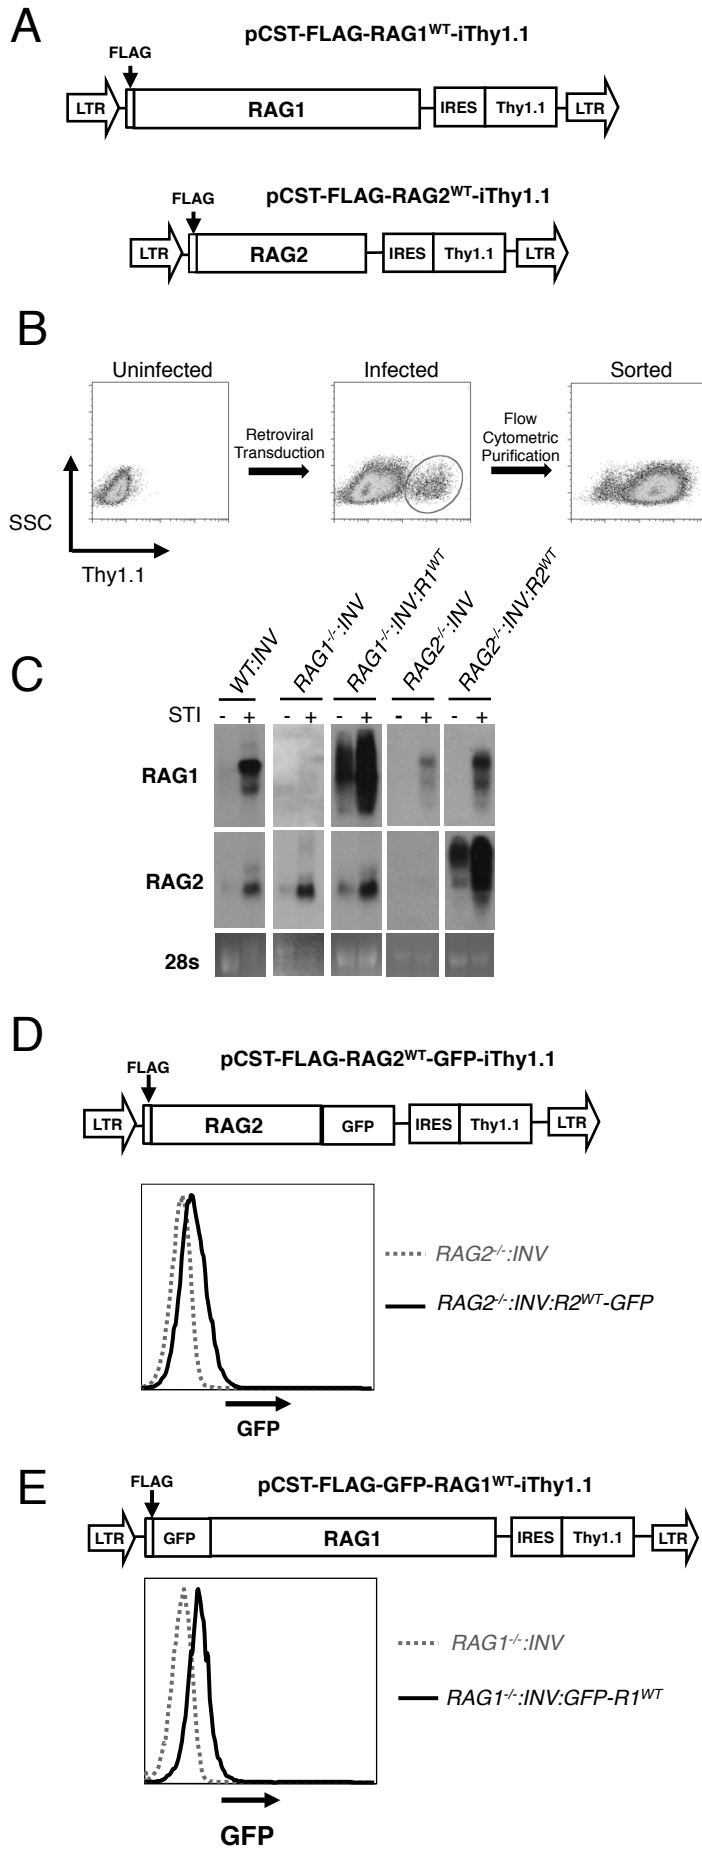

Supplemental Figure 1

Supplement: NIHMS305211-supplement-1.pdf [file NIHMS305211-supplement-1.pdf]

**A**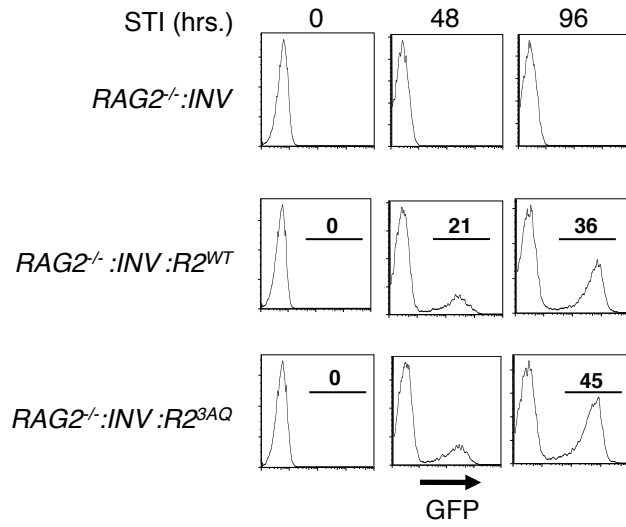**B**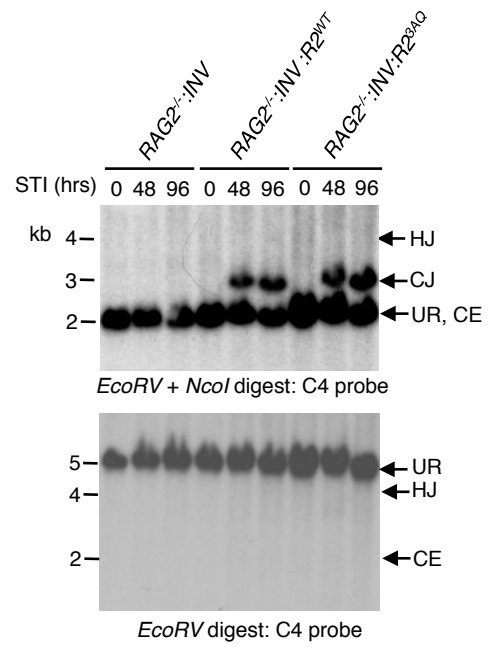**C**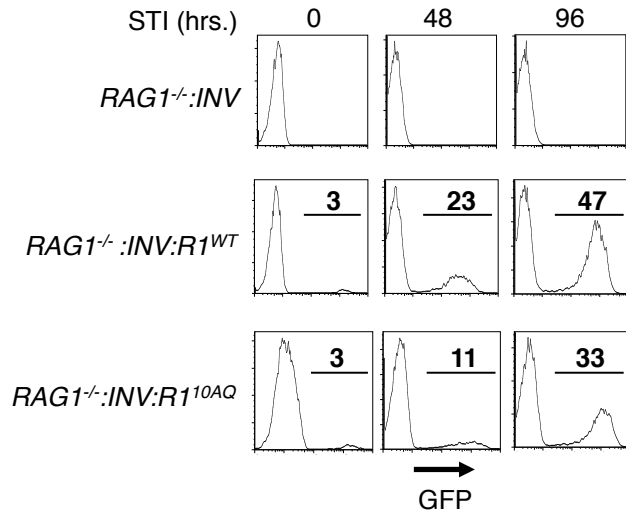**D**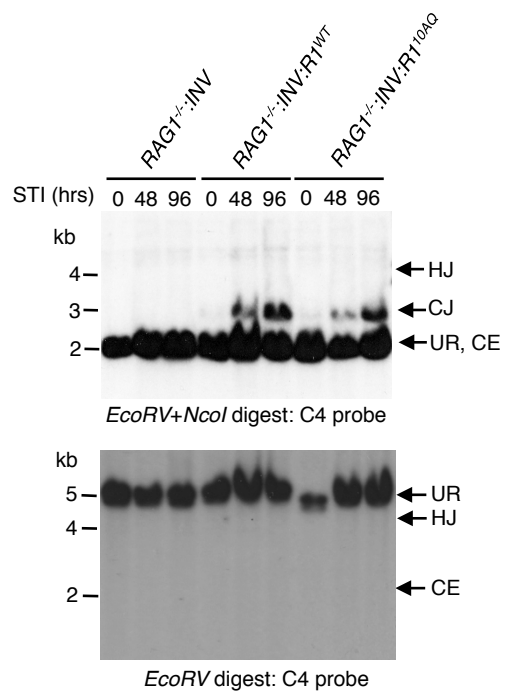

Supplemental Figure 2

Supplement: NIHMS305211-supplement-2.pdf [file NIHMS305211-supplement-2.pdf]

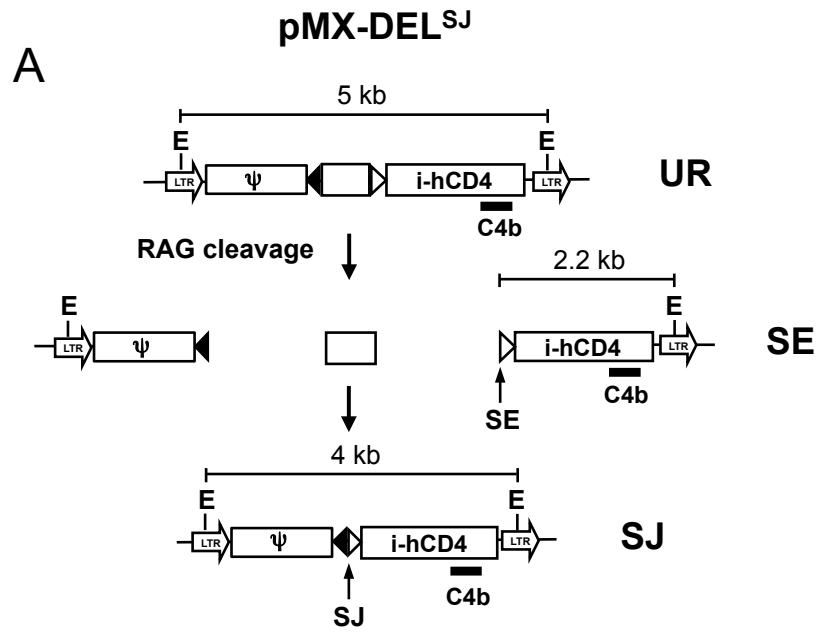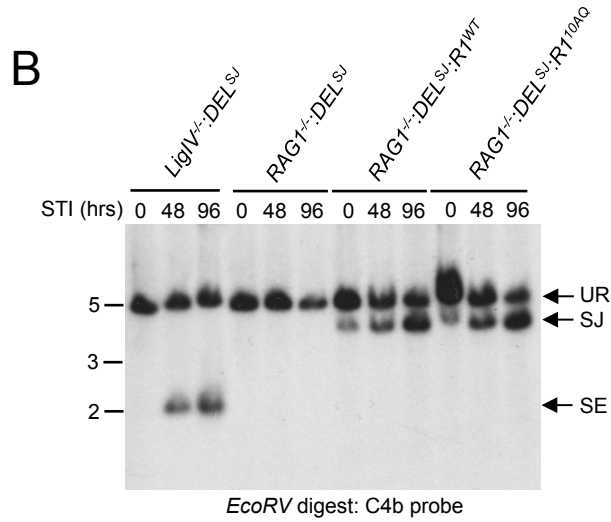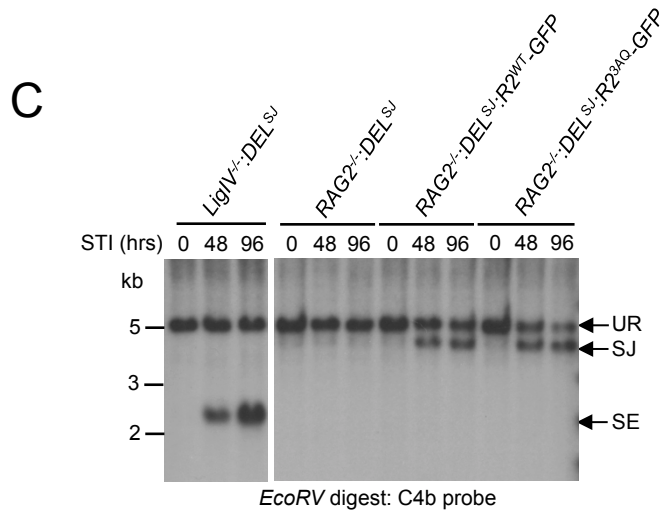

Supplemental Figure 3

Supplement: NIHMS305211-supplement-3.pdf [file NIHMS305211-supplement-3.pdf]
